# Supplementary material for: A Novel Subtype of Bovine Hepacivirus Identified in Ticks Reveals the Genetic Diversity and Evolution of Bovine Hepacivirus
Source: MDPI journal article supplement (doi:10.3390/v13112206), 2021-11-02
Supplement: s1 [file s1]

**Table S1.** Information about the sequences used in this study.

| <b>Virus species</b> | <b>GenBank accession number</b> | <b>Country</b> |
|----------------------|---------------------------------|----------------|
| Bovine hepacivirus   | KP641125                        | Germany        |
|                      | KP641123                        | Germany        |
|                      | KP641127                        | Germany        |
|                      | KP641124                        | Germany        |
|                      | KP641126                        | Germany        |
|                      | MH027953                        | Germany        |
|                      | MH027948                        | Germany        |
|                      | KP265950                        | Ghana          |
|                      | KP265948                        | Ghana          |
|                      | KP265943                        | Ghana          |
|                      | KP265947                        | Ghana          |
|                      | KP265946                        | Ghana          |
|                      | MG781019                        | Brazil         |
|                      | MG781018                        | Brazil         |
|                      | MG257793                        | China          |
|                      | MG257794                        | China          |
|                      | MN266283                        | China          |
|                      | MN266284                        | China          |
|                      | MN266285                        | China          |
|                      | MZ221927                        | China          |
|                      | MZ540979                        | China          |
|                      | MZ540980                        | China          |
|                      | MN691105                        | China          |
| Hepatitis C virus    | EU781832                        | USA            |
|                      | KC844047                        | China          |
|                      | AM910652                        | Spain          |
|                      | KF676352                        | China          |
|                      | AF238486                        | Japan          |
|                      | JX227965                        | United Kingdom |
|                      | KC844050                        | China          |

---

|          |                 |
|----------|-----------------|
| JX227953 | United Kingdom  |
| JX227968 | Canada          |
| JQ717260 | India           |
| LC414155 | Japan           |
| JX227954 | United Kingdom  |
| JX227955 | United Kingdom  |
| DQ418788 | USA             |
| KC844045 | China           |
| JX227963 | United Kingdom  |
| JX227958 | United Kingdom  |
| JX227961 | United Kingdom  |
| JX227970 | United Kingdom  |
| JX227979 | United Kingdom  |
| JX227962 | United Kingdom  |
| JX227960 | United Kingdom  |
| KC844046 | China           |
| NC009826 | United Kingdom  |
| DQ480524 | China-Hong Kong |
| EF424629 | Thailand        |
| LC435027 | Cambodia        |
| DQ835764 | Thailand        |
| DQ314806 | China-Hong Kong |
| DQ835770 | Thailand        |
| DQ835769 | Thailand        |
| DQ278893 | China           |
| EF424628 | USA             |
| DQ835767 | Thailand        |
| EF424627 | Canada          |
| EF424626 | Canada          |
| EF424625 | Canada          |
| LC435028 | Cambodia        |
| EU798761 | China           |
| NC030791 | Canada          |

---

---

|                    |          |             |
|--------------------|----------|-------------|
| Equine hepacivirus | NC038425 | USA         |
|                    | NC024889 | Japan       |
|                    | MT955624 | USA         |
|                    | MT955623 | USA         |
|                    | MT955622 | USA         |
|                    | MH027992 | Germany     |
|                    | MN734124 | China       |
|                    | MK644936 | China       |
|                    | KX056116 | South Korea |
|                    | KX421286 | Germany     |
|                    | KT880192 | France      |

---
