# Supplementary material for: A Novel Subtype of Bovine Hepacivirus Identified in Ticks Reveals the Genetic Diversity and Evolution of Bovine Hepacivirus
Source: MDPI journal article supplement (doi:10.3390/v13112206), 2021-11-02
Supplement: s1 [file s1]

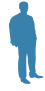

NC038882 CATCCTCTGAGCCCGCCCCCTTCTGGC''''''TGCCCCCCCGACTCC''''''GACGTTGAGTC 7199  
NC004102 CATCCTCTGAGCCCGCCCCCTTCTGGC''''''TGCCCCCCCGACTCC''''''GACGTTGAGTC 7199  
NC009823 CGGGC''''GCTGCCGATTCCGGCAGTCAGACGCCTCCTGATGAGTTGGCCCTTTCGGAGACAGGTTTC 7199  
NC009824 CGACA-CACAGTCCAGCACTACTTCCAAGGTCCCCCTTCTCCGGGAGGGGAG''TCCGACTCAGAGTC 7199  
NC009825 ---C---CGAGCTCAGACCGT---GATACAGACCTTACCACCCCAACT--GAGACCACAGAC-TCGGGCC 7117  
NC009826 -----CCAGGATTCTGCGTT---GG-GTACTAGCAGCCAACACGAT-----TCGGGGC-CTGAGGA 7139  
NC009827 -----CCGAGCTCCGGCCTC---GGAGGGTCAATAGCCGGCCCATCA-----TCTCCTGAC-CCGACAA 7153  
NC030791 -----AGGAGGCACCCCCC---AGCGACTCCGCCATTAGTCTGGAT-----TCACCGGCGGCAATGA 7130

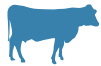

KP641125 CCTACGCCTGGGGCGGTCTTGAGCCT''TTCGTCAGCTCCAGATTTTTGACACTCCACCTCCTCCTTA 6365  
KP641123 CCTACGCCTGGGGCGGCCTTGAGCCT''TTCGTCAGCTCCAGATTTTTGACACTCCACCTCCTCCTTA 6365  
KP641127 CCTACGCCTGGGGCGGCCTTGAGCCT''TTCGTCAGCTTCAGATGTTTGACACTCCACCTCCTCCTTA 6365  
KP641124 CCTACGCCTGGGGCGGCCTTGAGCCT''TTCGTCAGCTCCAAATGTTTGACACTCCACCTCCTCCTTA 6365  
KP641126 CCTACGCCTGGGGCGGCCTTGAGCCT''TTCGTCAGCTCCAAATGTTTGACACTCCACCTCCTCCTTA 6365  
MH027953 CCTATGCCTGGGGCGGTCTTGAGCCT''TTCGTCAGCTTGAAATGTTTGACACTCCACCTCCCTCCTTA 6365  
KP265950 ''''TTCTGGGCGGGGTTGCAGCC''TTCGGCCAATTACAGGTGTTTGAAACTCCACCACCCCTTA 6365  
KP265948 ''''TTCTGGGCGGGGCTGCAACCC''TTCGGCCAATTACAGGTGTTTGAAACTCCACCACCCCTTA 6365  
KP265943 ''''TTCTGGGCGGGGCTGCAACCT''TTCGGCCAATTACAGGTGTTTGAAACTCCACCACCCCTTA 6365  
KP265947 ''''TTTGGGCGGGCCTGCAGCCT''TTCGGACAAATTACAGGTTTTTGAGACTCCACCACCCCTTA 6365  
KP265946 ''''TTTGGGCGGGCCTGCAGCCT''TTCGGACAAATTACAGGTTTTTGAGACTCCACCACCCCTTA 6365  
MG781019 CCTACTTCTGGGGTGGACTTGAGCCC''TTCGCCAGTTGCAGATGTTTGACACTCCACCTCCACCTTA 6365  
MG781018 CCTATTTCTGGGGTGGACTTGAGCCC''TTCGCCAGTTGCAGATGTTTGACACTCCACCTCCACCTTA 6365  
MG257793 ''''TTCTGGGCGGGGCTGCAGCCT''TTCGGACAAATTACAGGTATTTGACACTCCACCACCTCCTTA 6365  
MG257794 ''''TTCTGGGCGGGGCTGCAGCCT''TTCGGACAAATTACAGGTATTTGACACTCCACCACCTCCTTA 6365  
MH027948 ''''TTCTGGGCGGGTTCAGCCT''TTCGGTCAACTCCAGGTGTTTGACACTCCACCTCCTCCTTA 6365  
MN266283 CTTACTTCTGGGGCGGTCTCGAGCCC''TTCGTCAACTTCAGATGTTTGACACTCCACCACCTCCTTA 6365  
MN266285 CCTACTTCTGGGGCGGCCTTGAGCCT''TTCGCCAACTTCAGATGTTTGACACTCCACCTCCTCCTTA 6365  
MN266284 CCTACTTCTGGGGCGGCCTTGAGCCT''TTCGCCAACTTCAGATGTTTGACACTCCACCTCCTCCTTA 6365  
MZ221927 CCTACTTTGGGGGGGGCTTGAACCT''TTCGCCAACTGCAGATGTTTGACACTCCACCTCCACCTTA 6365  
MZ540979 CCTACTTTGGGGGGGGCTTGAACCC''TTCGCCCTACTGCAGATGTTTGACACTCCACCTCCACCTTA 6365  
MZ540980 CCTACTTTGGGGGGGGCTTGAACCC''TTCGCCCTACTGCAGAGTTTGACACTCCACCTCCACCTTA 6365  
MN691105 ''''TTCTGGAGCGGTCTGACGCCGAGCTCGGTCAACTCCAAATCTTTGACACCCCGCCGCCACCGTA 6365

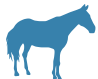

NC038425 TAACAATTACTTTAAACTTTTGCTTGTGCTTTTAGCTTATTCAGGCTTAGTTTCTTGT'''''''' 1188  
NC024889 TAATAATTACTTTAAATTATGCTTATTACTCTTGGCTTATTCTGGCTTAGTTTCTTGTACT'''''' 1188  
MT955624 AAATAATTACTTTAAGCTTTTGCCTGTTGCTTTTAGCTATTCTGGCTTAGTTTCTTGTGGGAACGATAAT 1188  
MT955623 AAATAATTACTTTAAGCTTTTGCCTGTTGCTTCTAGCTATTCTGGCTTAGTTTCTTGT''''''GAT 1188  
MT955622 AAATAATTACTTTAAGCTTTTGCCTGTTGCTTCTAGCTATTCTGGCTTAGTTTCTTGT''''''GAT 1188  
MH027992 CAATAATTACTTTAAACTTTTGCTTATTGCTTTTAGCTTATTCGGCATTAGTTTCTTGTGATGAT'''' 1188  
MN734124 TAACAATTACTTTAAGCTTTTGTCTGCTGCTTTTAGCTTACTCAGGCTTAGTTTCTTGTGAT'''' 1188  
MK644936 TAACAATTATTTCAAGCTTTTGCTTACTTTTTGGCATATTCTGGCTTGTTTCTTGTGGCACCTCAGAA 1188  
KX056116 TAACAATTACTTTAAACTTTTGCTTATTGCTTTTAGCTTATTCAGGCTTAGTTTCTTGTAAAT'''' 1188  
KX421286 TAATAATTACTTTAAGCTTTTGCCTATTGCTTTTGGCGTATTCTGGCTTAGTTTCTTGTGATTCT''ACA 1188  
KT880192 AAACAATTACTTCAAGCTGTGTTTACTGCTTTTAGCTTATTCTGCCTTGTTTCTGT''''''GAA 1188

**Figure S1.** Multiple sequence alignment showing the example of variation in genomics of hepaciviruses in bovine, humans, and equine.
